# Supplementary material for: Rehabilitation exercise assessment using inertial sensors: a cross-sectional analytical study
Source: PubMed Central journal article supplement (PMC4280766; doi:10.1186/1743-0003-11-158), 2014-11-27
Supplement: 12984_2014_687_MOESM1_ESM.pdf [file 12984_2014_687_MOESM1_ESM.pdf]

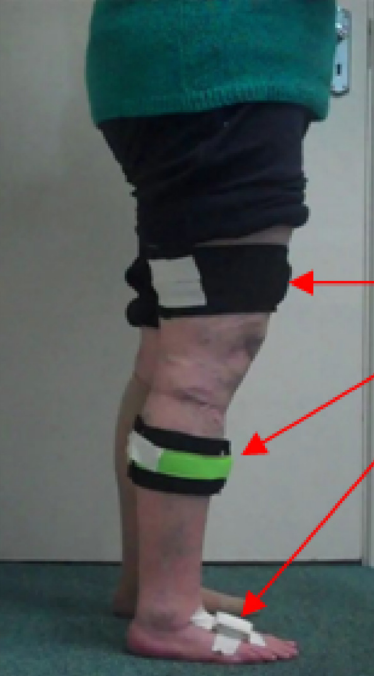

**Inertial Sensor on Thigh, Shin,  
and Foot**
